# Supplementary material for: Spin crossover {[Fe(atrz)3](OTs)2}n monolith: a green synthesis approach for Robust switchable materials
Source: Royal Society of Chemistry journal article supplement (doi:10.1039/d4dt00684d), 2024-01-01
Supplement: d4dt00684d1.pdf [file d4dt00684d1.pdf]

## Spin Crossover {[Fe(atrz)<sub>3</sub>](OTs)<sub>2</sub>]<sub>n</sub> Monolith: A green Synthesis Approach for Robust Switchable Materials

Ana Martinez-Martinez,<sup>a</sup> Pablo Albacete,<sup>b</sup> Mar García-Hernández,<sup>c</sup> Esther Resines-Urien,<sup>\*a</sup> David Fairen-Jimenez,<sup>\*b</sup> and José Sánchez Costa<sup>\*a</sup>

|                                                           |           |
|-----------------------------------------------------------|-----------|
| <b>1) Experimental Section</b>                            | <b>S2</b> |
| <b>2) Synthesis of 1, 2 and 3</b>                         | <b>S3</b> |
| <b>3) Fourier Transform Infrared Spectroscopy (FTIR)</b>  | <b>S3</b> |
| <b>4) Thermogravimetric analyses</b>                      | <b>S4</b> |
| <b>5) Differential Scanning Calorimetry (DSC) studies</b> | <b>S5</b> |
| <b>6) Dynamic light Scattering (DLS)</b>                  | <b>S6</b> |
| <b>7) Magnetic measurements</b>                           | <b>S8</b> |

## 1) Experimental Section

**Materials.** Chemicals and reagents were purchased from commercial suppliers and used as received.

### **Physical measurements.**

- TGA was performed using a TA Instrument TGAQ500 with a ramp of 2 K min<sup>-1</sup> under air from 303 K to 873 K.
- FTIR spectra were recorded as neat samples in the range 400-4000 cm<sup>-1</sup> on a Bruker Tensor 27 (ATR device) Spectrometer.
- Elemental analyses (C, H and N) were performed on a LECO CHNS-932 Analyzer at the “Servicio Interdepartamental de Investigación (SIdI)” at Autónoma University of Madrid.
- Magnetic susceptibility measurements were carried out in a Quantum Design MPMS-5S SQUID magnetometer under a 10000 Oe field at a rate of 2 K·min<sup>-1</sup>. Each sample was secured inside a plastic capsule. Pascal constants were used to correct for the diamagnetic contribution.
- Dynamic light scattering (DLS) was carried out in a Malvern Zetasizer Nano-ZS in tetrahydrofuran (THF) at room temperature, with quartz glass cuvettes.
- Scanning Electron Microscopy (SEM) images were obtained in a field emission (FE-SEM), SIGMA 360 VP Carl Zeiss equipment, at 2kV.

## 2) Synthesis of 1, 2 and 3

Compound **1** was synthesized at room temperature, by adding drop by drop a solution of 0.59 mmol of atrz (atrz = 4-Amino-4H-1,2,4-triazole) in 3 mL of ethanol on top of a solution of 0.20 mmol of  $[\text{Fe}(\text{H}_2\text{O})_6](\text{OTs})_2$  (OTs = *p*-tolouenesulfonate) in 3 mL of distilled water. The solution was stirred for 1 h, filtered, and washed with ethanol. Compound **1** was obtained as a pink powder in 87% yield.

Anal. calcd for **1**  $0.4\text{H}_2\text{O}$ : C 36.53%, H 4.11%, N 25.56%; found C 36.34%, H 4.05%, N 25.79%.

Compound **2** was synthesized at room temperature by adding a solution of 3 mmol of atrz in 5 mL of ethanol on top of a solution of 1 mmol of  $[\text{Fe}(\text{H}_2\text{O})_6](\text{OTs})_2$  in 5 mL of ethanol. The solution was stirred for 30 minutes, filtered, and washed with ethanol. Compound **2** was obtained as a pink powder in 79% yield.

Anal. calcd for **2**  $0.4\text{H}_2\text{O}$ : C 36.53%, H 4.11%, N 25.56%; found C 36.59%, H 4.05%, N 25.83%.

Compound **3** was synthesized at room temperature by adding a solution of 3 mmol of atrz in 5 mL of ethanol on top of a solution of 1 mmol of  $[\text{Fe}(\text{H}_2\text{O})_6](\text{OTs})_2$  in 5 mL of ethanol. The solution was stirred for 30 minutes, centrifuged (5000 rpm, 15 minutes, RT), and washed with 10 mL of ethanol three times. Compound **3** was obtained as a purple dense and compact monolith in 83% yield.

Anal. calcd for **3**  $0.65\text{H}_2\text{O}$ : C 36.28%, H 4.16%, N 25.38%; found C 36.36%, H 4.36%, N 25.56%.

## 3) Fourier Transform Infrared Spectroscopy (FTIR)

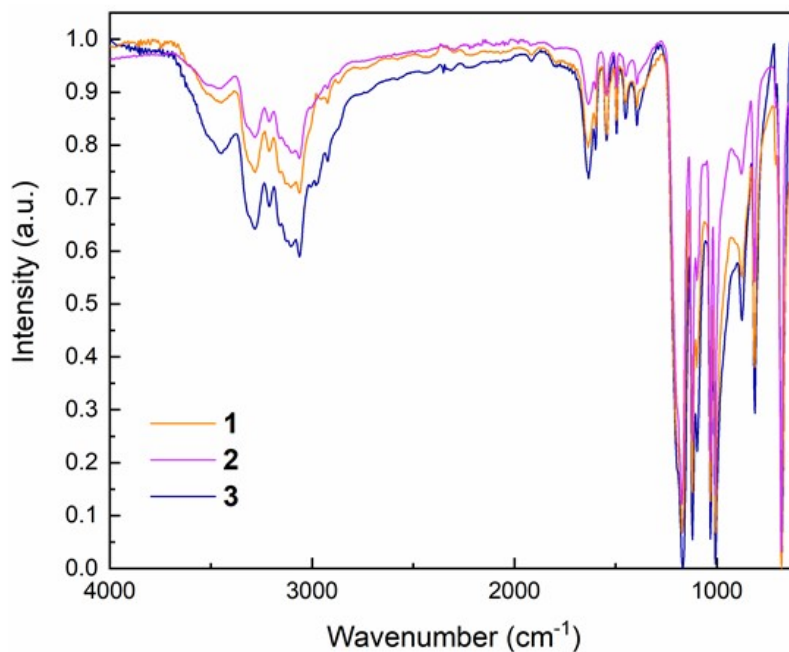

**Figure S1.** FTIR spectra of **1**, **2** and **3** between 4000 and 600  $\text{cm}^{-1}$ .

FTIR **1** ( $\text{cm}^{-1}$ ):  $\nu$  = 3441 (w;  $\nu(\text{OH})$ ), 3293 (m;  $\nu(\text{NH})$ ), 3210 (w), 3062 (m;  $\nu(\text{CH})_{\text{ar}}$ ), 3012 (w), 2924 (w), 1631 (m), 1600 (w), 1546 (m;  $\delta(\text{NH})$ ), 1496 (w), 1449 (w;  $\delta(\text{CH})_{\text{ar}}$ ), 1396 (w), 1170 (s;  $\nu(\text{S} = \text{O})_{\text{OTs}}$ ), 1122 (s), 1098 (m), 1033 (s;  $\nu(\text{S} = \text{O})_{\text{OTs}}$ ), 1008 (s;  $\nu(\text{S} = \text{O})_{\text{OTs}}$ ), 908 (w), 881 (w), 813 (m;  $\delta(\text{ring})$ ), 709 (w), 681 (s;  $\nu(\text{CS})_{\text{OTs}}$ ), 623 (s), 563 (s;  $\nu(\text{CS})_{\text{OTs}}$ ), 493 (w), 457 (w).

FTIR **2** ( $\text{cm}^{-1}$ ):  $\nu$  = 3441 (w;  $\nu(\text{OH})$ ), 3293 (m;  $\nu(\text{NH})$ ), 3210 (w), 3062 (m;  $\nu(\text{CH})_{\text{ar}}$ ), 3012 (w), 2924 (w), 1631 (m), 1600 (w), 1546 (m;  $\delta(\text{NH})$ ), 1496 (w), 1449 (w;  $\delta(\text{CH})_{\text{ar}}$ ), 1396 (w), 1170 (s;  $\nu(\text{S} = \text{O})_{\text{OTs}}$ ), 1122 (s), 1098 (m), 1033 (s;  $\nu(\text{S} = \text{O})_{\text{OTs}}$ ), 1008 (s;  $\nu(\text{S} = \text{O})_{\text{OTs}}$ ), 908 (w), 881 (w), 813 (m;  $\delta(\text{ring})$ ), 709 (w), 681 (s;  $\nu(\text{CS})_{\text{OTs}}$ ), 623 (s), 563 (s;  $\nu(\text{CS})_{\text{OTs}}$ ), 493 (w), 457 (w).

FTIR **3** ( $\text{cm}^{-1}$ ):  $\nu$  = 3441 (w;  $\nu(\text{OH})$ ), 3293 (m;  $\nu(\text{NH})$ ), 3210 (w), 3062 (m;  $\nu(\text{CH})_{\text{ar}}$ ), 3012 (w), 2924 (w), 1631 (m), 1600 (w), 1546 (m;  $\delta(\text{NH})$ ), 1496 (w), 1449 (w;  $\delta(\text{CH})_{\text{ar}}$ ), 1396 (w), 1170 (s;  $\nu(\text{S} = \text{O})_{\text{OTs}}$ ), 1122 (s), 1098 (m), 1033 (s;  $\nu(\text{S} = \text{O})_{\text{OTs}}$ ), 1008 (s;  $\nu(\text{S} = \text{O})_{\text{OTs}}$ ), 908 (w), 881 (w), 813 (m;  $\delta(\text{ring})$ ), 709 (w), 681 (s;  $\nu(\text{CS})_{\text{OTs}}$ ), 623 (s), 563 (s;  $\nu(\text{CS})_{\text{OTs}}$ ), 493 (w), 457 (w).

#### 4) Thermogravimetric analyses

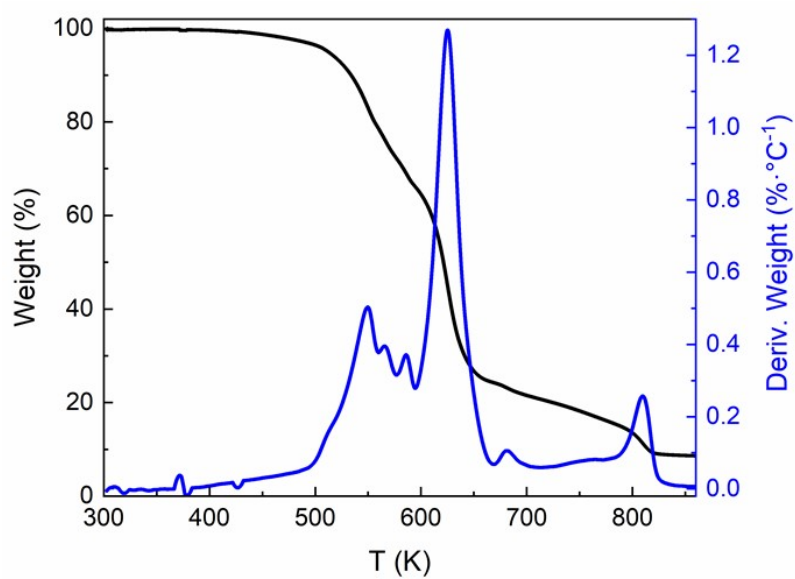

**Figure S2.** Thermogravimetric analysis of **1** between 300K and 873 K.

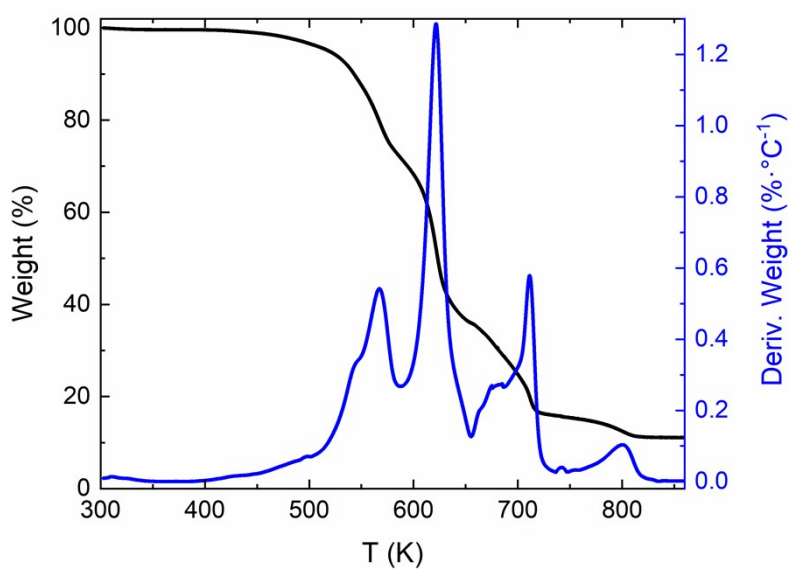

**Figure S3.** Thermogravimetric analysis of **2** between 300K and 873 K.

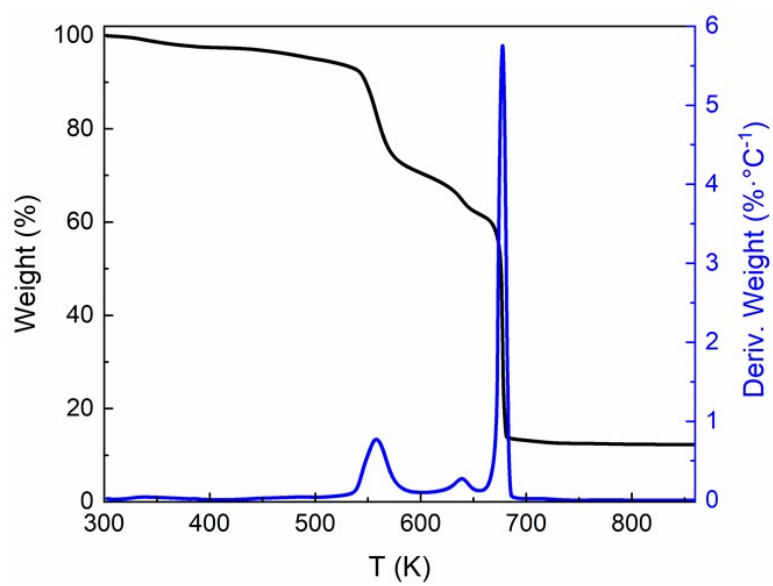

**Figure S4.** Thermogravimetric analysis of **3** between 300 K and 873 K.

## 5) Differential Scanning Calorimetry (DSC) studies

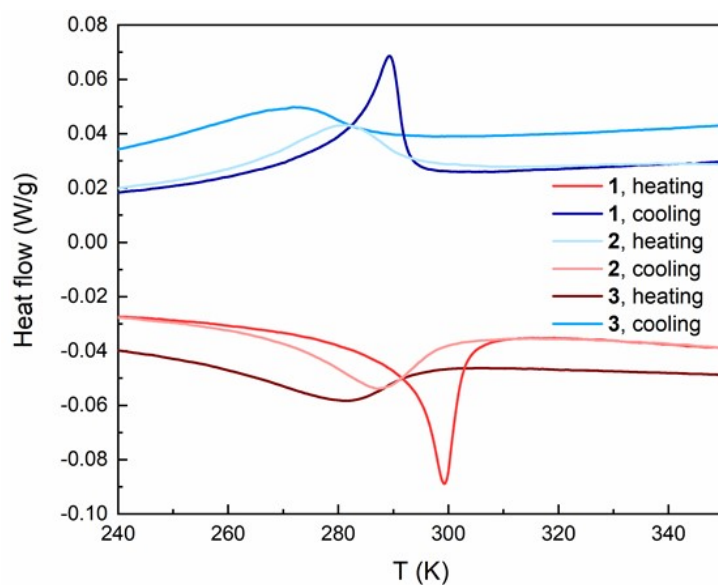

Figure S5. DSC of **1**, **2** and **3** between 230 K and 370 K.

Table S1. Enthalpy of the SCO for compounds **1**, **2** and **3**.

| Compound | Enthalpy <sub>↓</sub> (KJ/mol) | Enthalpy <sub>↑</sub> (KJ/mol) |
|----------|--------------------------------|--------------------------------|
| <b>1</b> | 5.9                            | 5.8                            |
| <b>2</b> | 5.5                            | 5.7                            |
| <b>3</b> | 5.4                            | 5.6                            |

## 6) Dynamic Light Scattering (DLS)

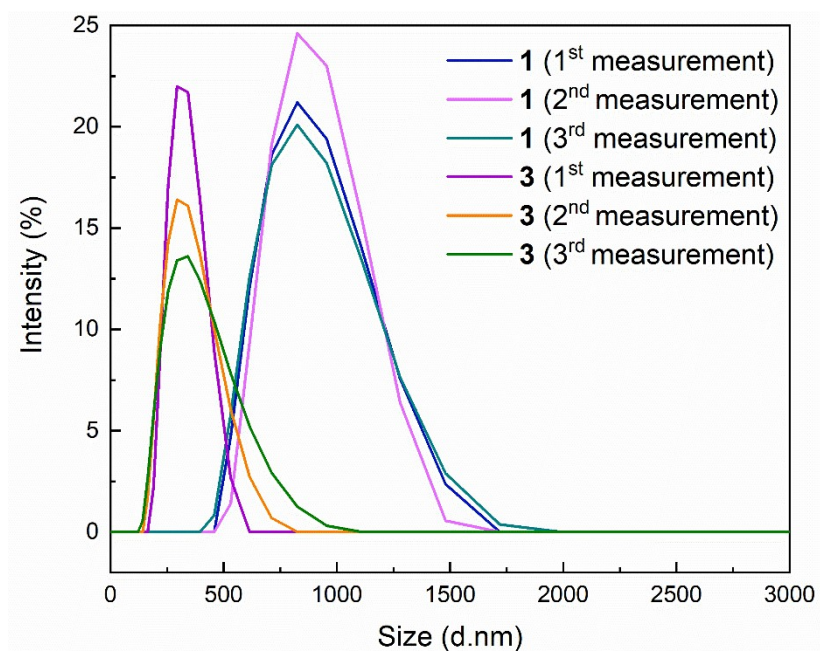

**Figure S6.** DLS measurements of compounds **1** and **3**. Each sample was measured three times.

Samples **1** and **3** were dispersed in tetrahydrofuran (THF) and sonicated for 30 minutes before performing the measurements. DLS measurements could not be successfully carried out for compound **2**, as it exhibits a significant polydispersion.

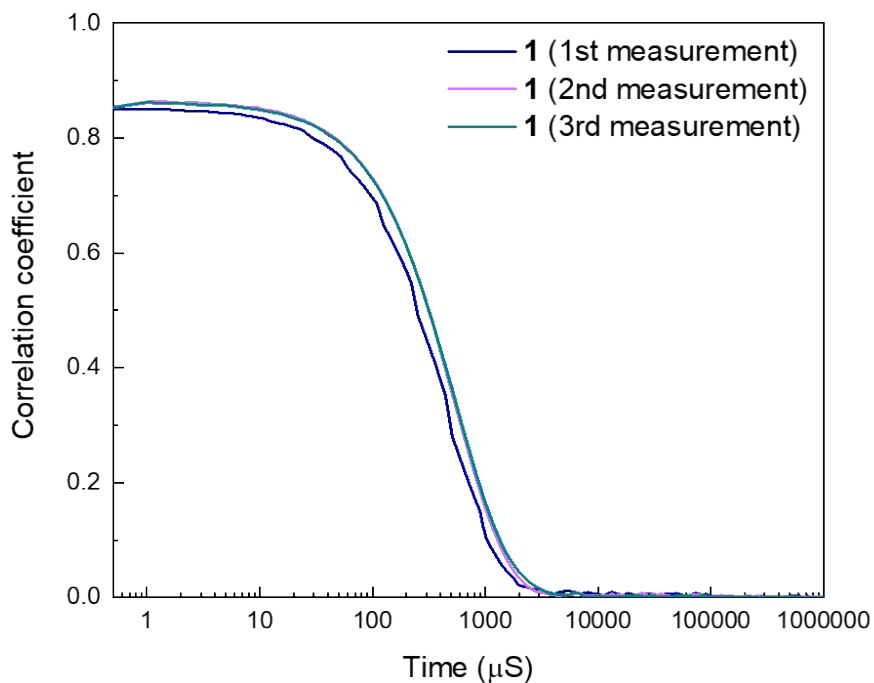

**Figure S7.** Correlation function of the DLS measurements of compound **1**.

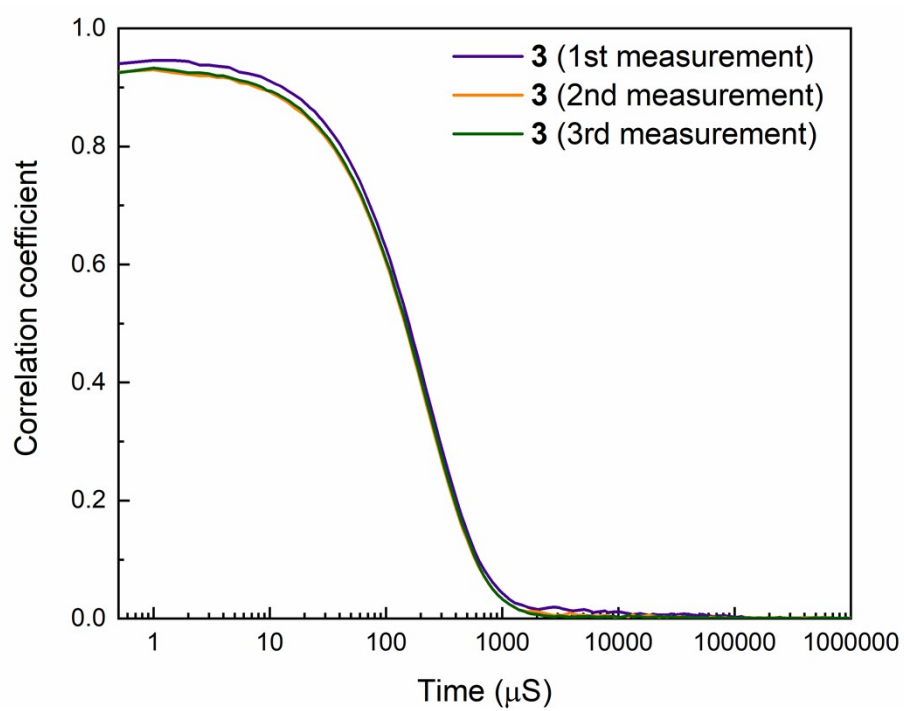

**Figure S8.** Correlation function of the DLS measurements of compound **3**.



## 7) Magnetic measurements

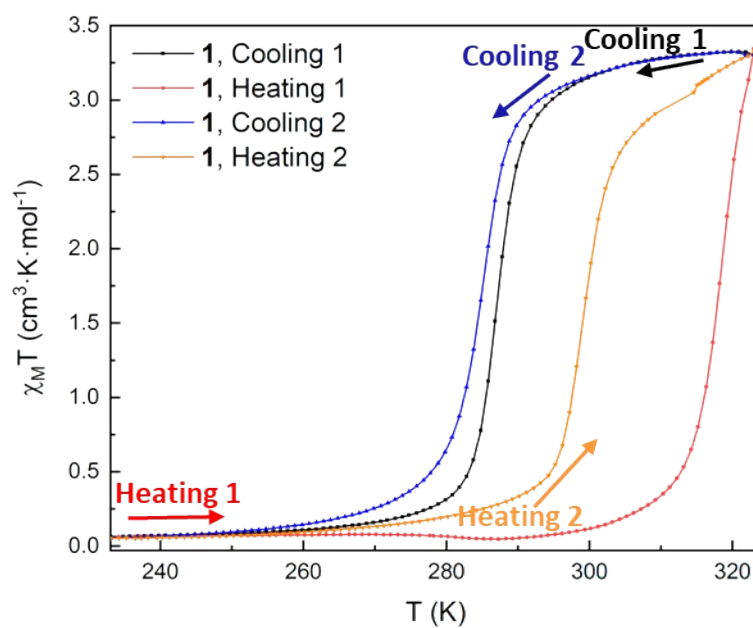

**Figure S9.**  $\chi_M T$  measured as a function of the temperature for **1** between 230 K and 330 K.

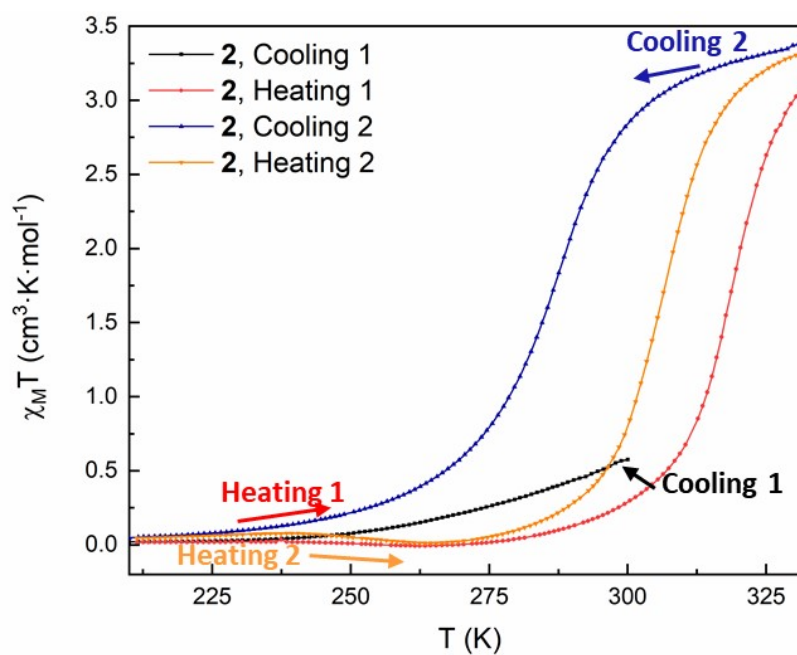

**Figure S10.**  $\chi_M T$  measured as a function of the temperature for **2** between 230 K and 330 K.

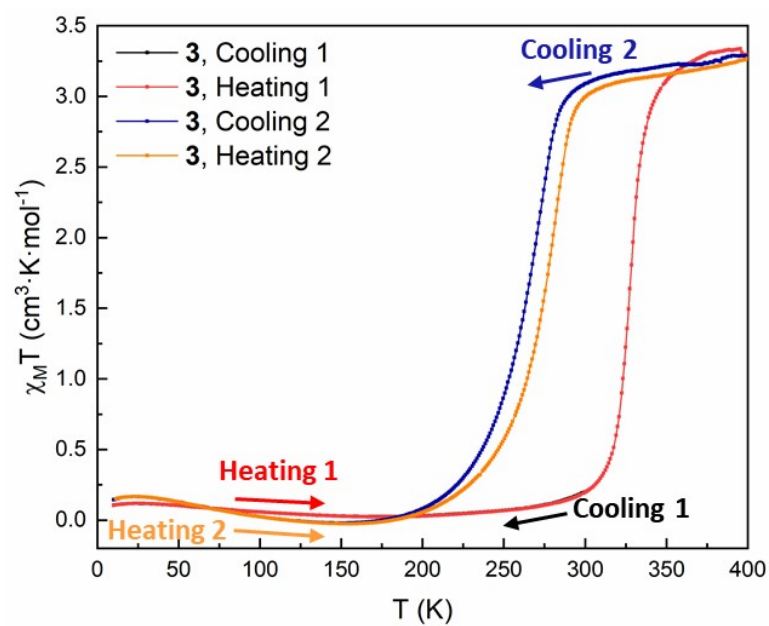

**Figure S11.**  $\chi_M T$  measured as a function of the temperature for **3** between 10 K and 400 K.

The samples were not dried in the oven. As can be seen in the TGA plots (see section 4), **1** contains 0.1 molecules of EtOH, **2** contains 0.5, and **3** contains 0.4, which is why the first transition cycle is shifted at high temperatures in both cases.
